# Supplementary material for: Efficient lanthanide Gd doping promoting the thermoelectric performance of Mg3Sb2-based materials
Source: Royal Society of Chemistry journal article supplement (doi:10.1039/d1ta07988c), 2021-01-01
Supplement: d1ta07988c1.pdf [file d1ta07988c1.pdf]

## Supporting information

### Efficient Lanthanide Gd Doping Promoting Thermoelectric

#### Performance of $\text{Mg}_3\text{Sb}_2$ -based Materials

Jingdan Lei,<sup>a</sup> Hexige Wuliji,<sup>a</sup> Kunpeng Zhao,<sup>\*a</sup> Tian-Ran Wei,<sup>a</sup> Qing Xu,<sup>b</sup> Peng Li,<sup>b</sup> Pengfei Qiu<sup>b</sup> and Xun Shi,<sup>\*ab</sup>

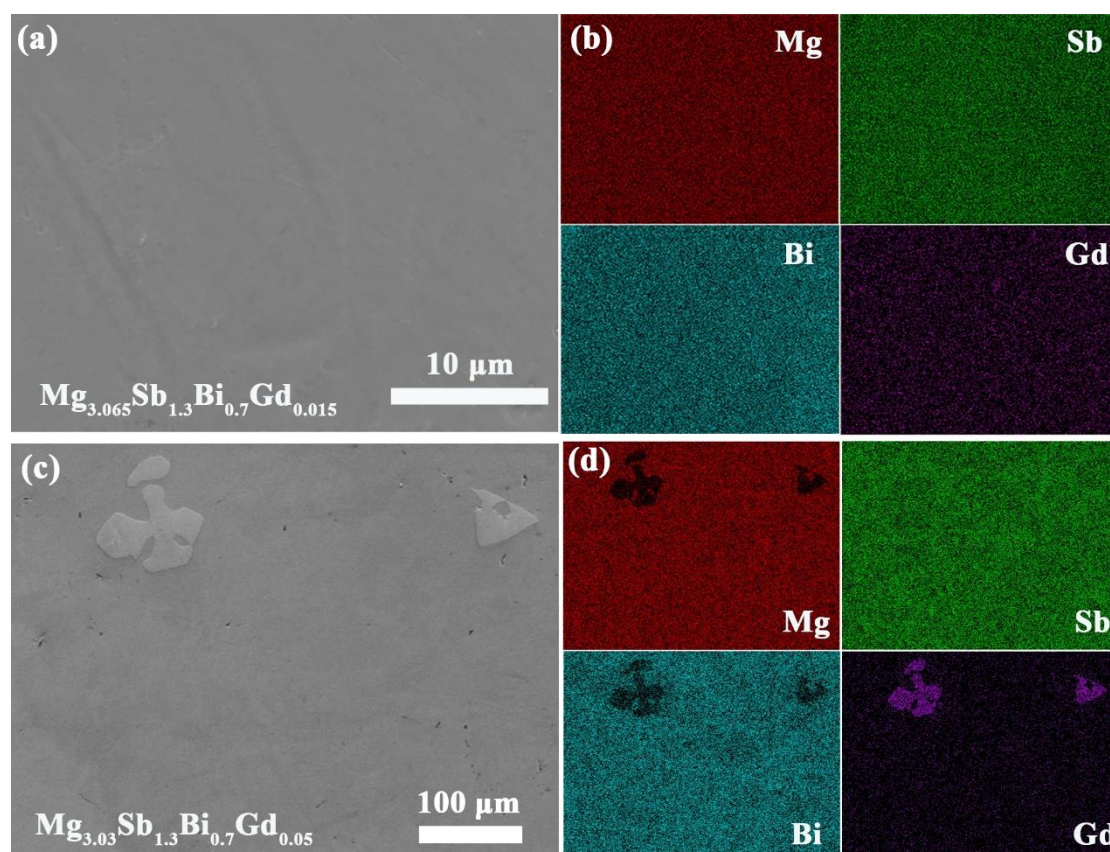

**Fig. S1** Backscattering scanning electron microscopy (BSE) images and (b) corresponding EDS mapping for  $\text{Mg}_{3.065}\text{Sb}_{1.3}\text{Bi}_{0.7}\text{Gd}_{0.015}$  and  $\text{Mg}_{3.03}\text{Sb}_{1.3}\text{Bi}_{0.7}\text{Gd}_{0.05}$ .

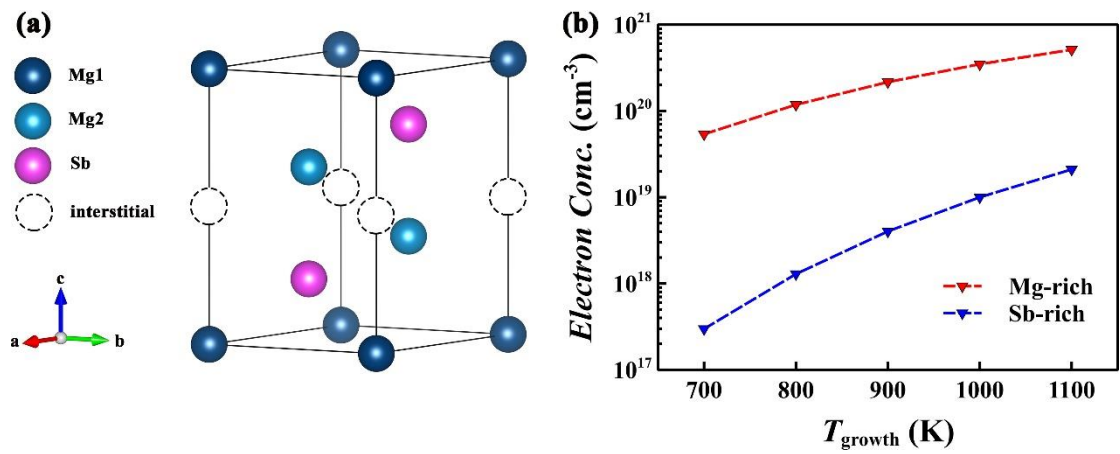

**Fig. S2** (a) The crystal structure of  $\text{Mg}_3\text{Sb}_2$  used for defect calculations. (b) Theoretically calculated electron concentrations for  $\text{Mg}_3\text{Sb}_2$  doped with Gd under the Mg-rich and Sb-rich conditions.

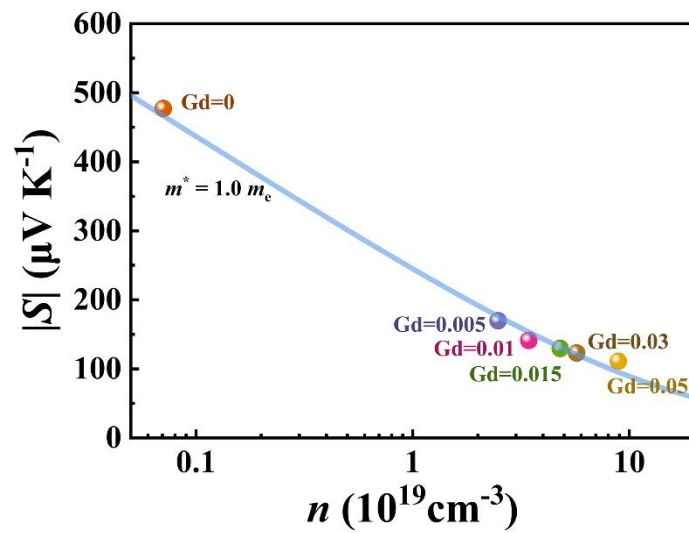

**Fig. S3** Room temperature experimental  $S$  vs  $n$  data, in comparison with the Pisarenko plot calculated by using single parabolic band (SPB) model.

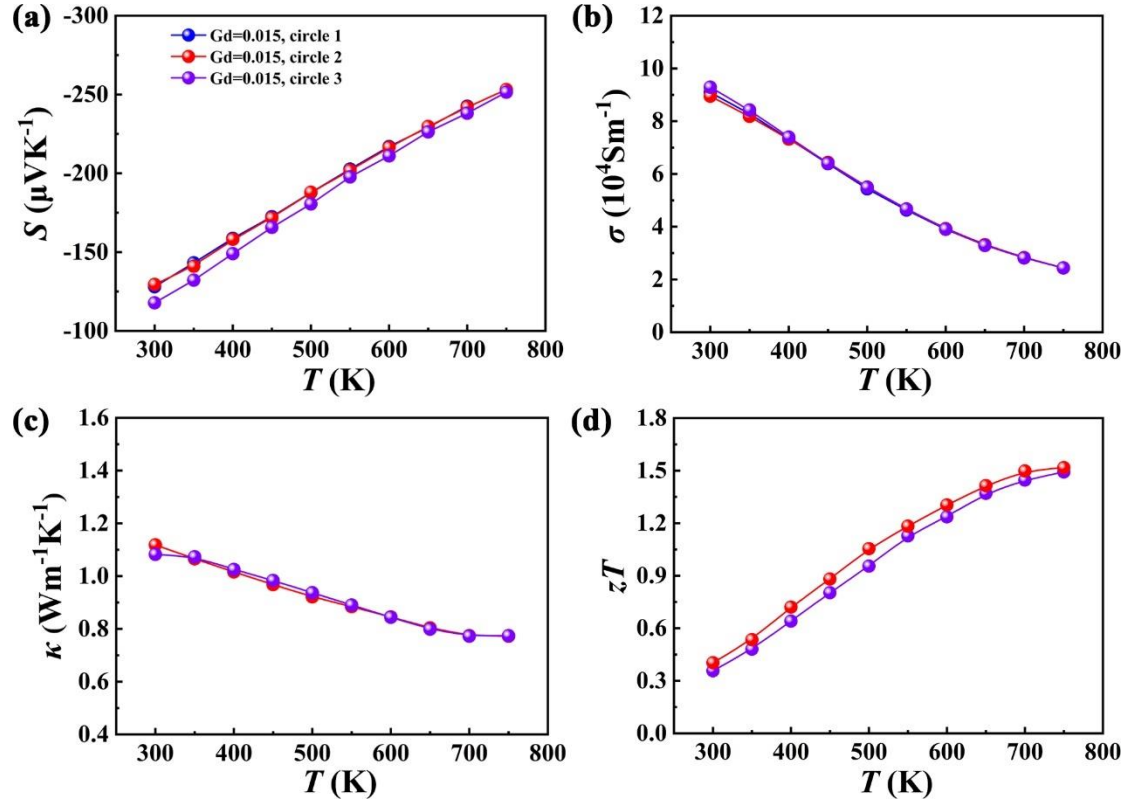

**Fig. S4** Reproducible testing of (a) Seebeck coefficient  $S$ , (b) electrical conductivity  $\sigma$ , (c) thermal conductivity  $\kappa$ , and (d)  $zT$  for  $\text{Mg}_{3.065}\text{Sb}_{1.3}\text{Bi}_{0.7}\text{Gd}_{0.015}$ .

**Table S1.** Parameters used to fit the lattice thermal conductivity ( $\kappa_L$ ) for  $\text{Mg}_{3.065}\text{Sb}_{1.3}\text{Bi}_{0.7}\text{Gd}_{0.015}$ .

| Fitting Parameters                 | $\text{Mg}_{3.065}\text{Sb}_{1.3}\text{Bi}_{0.7}\text{Gd}_{0.015}$ |
|------------------------------------|--------------------------------------------------------------------|
| $L$ ( $\mu\text{m}$ )              | 20                                                                 |
| $A$ ( $10^{-41} \text{s}^3$ )      | 16.9                                                               |
| $B$ ( $10^{-18} \text{s K}^{-1}$ ) | 30                                                                 |
